# Supplementary material for: phyloFlash: Rapid Small-Subunit rRNA Profiling and Targeted Assembly from Metagenomes
Source: PubMed Central journal article supplement (PMC7593591; doi:10.1128/msystems.00920-20), 2020-10-27

**A**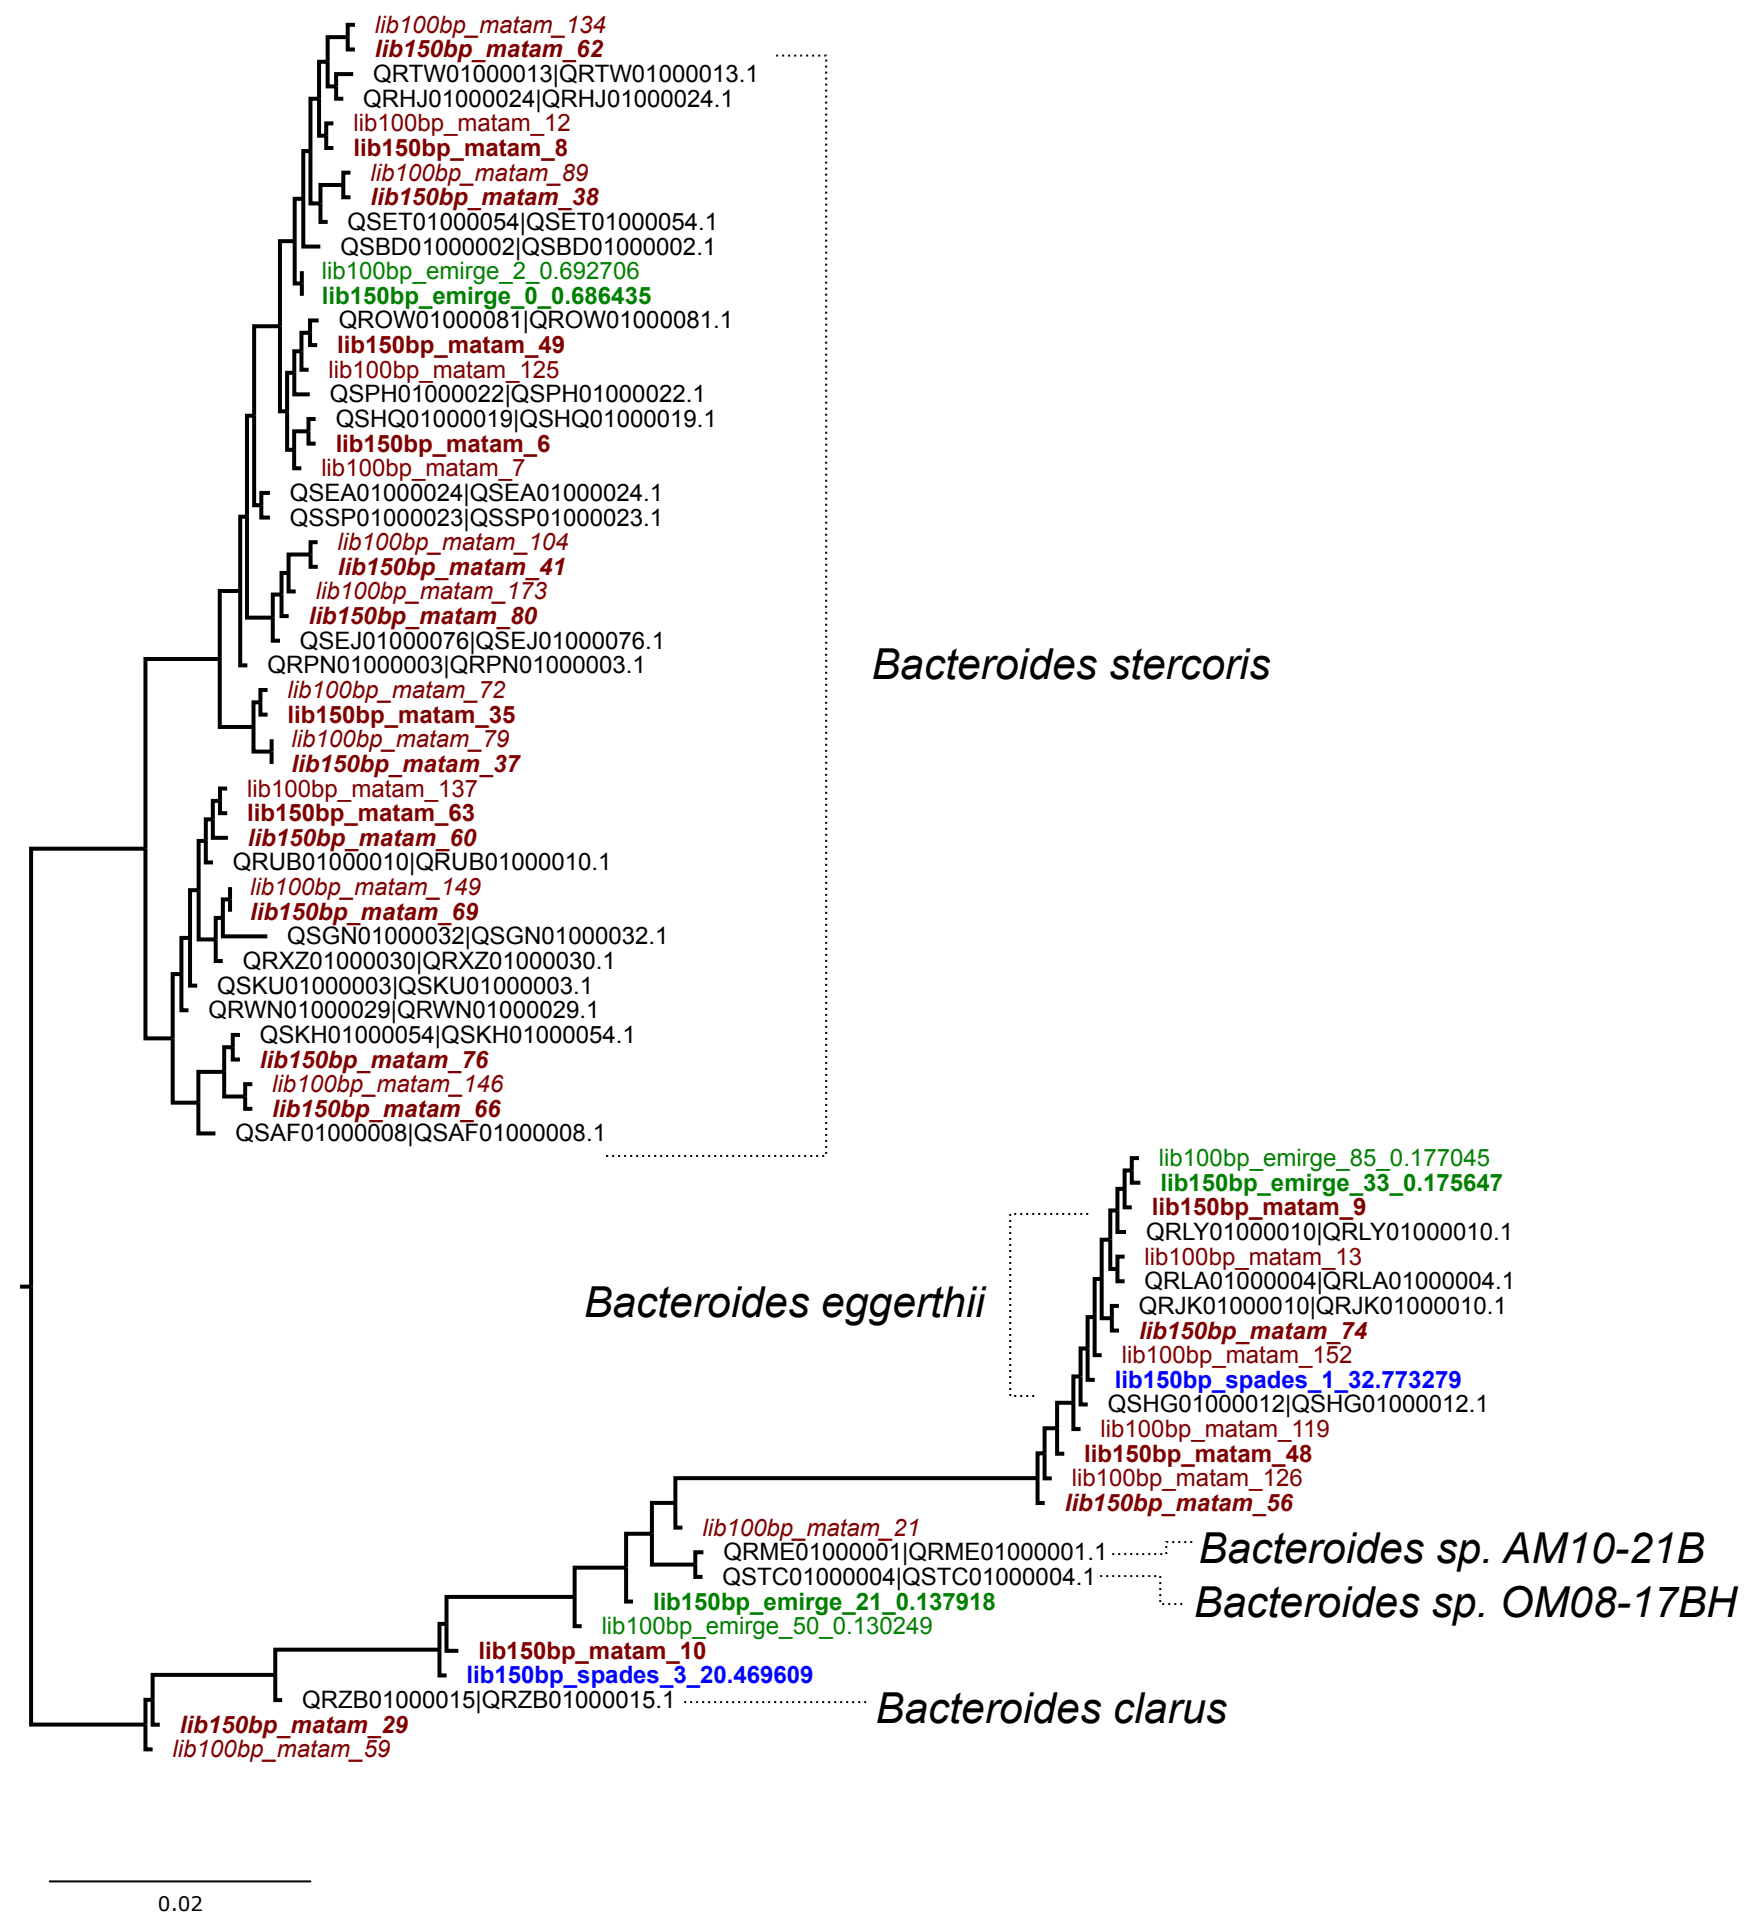**B**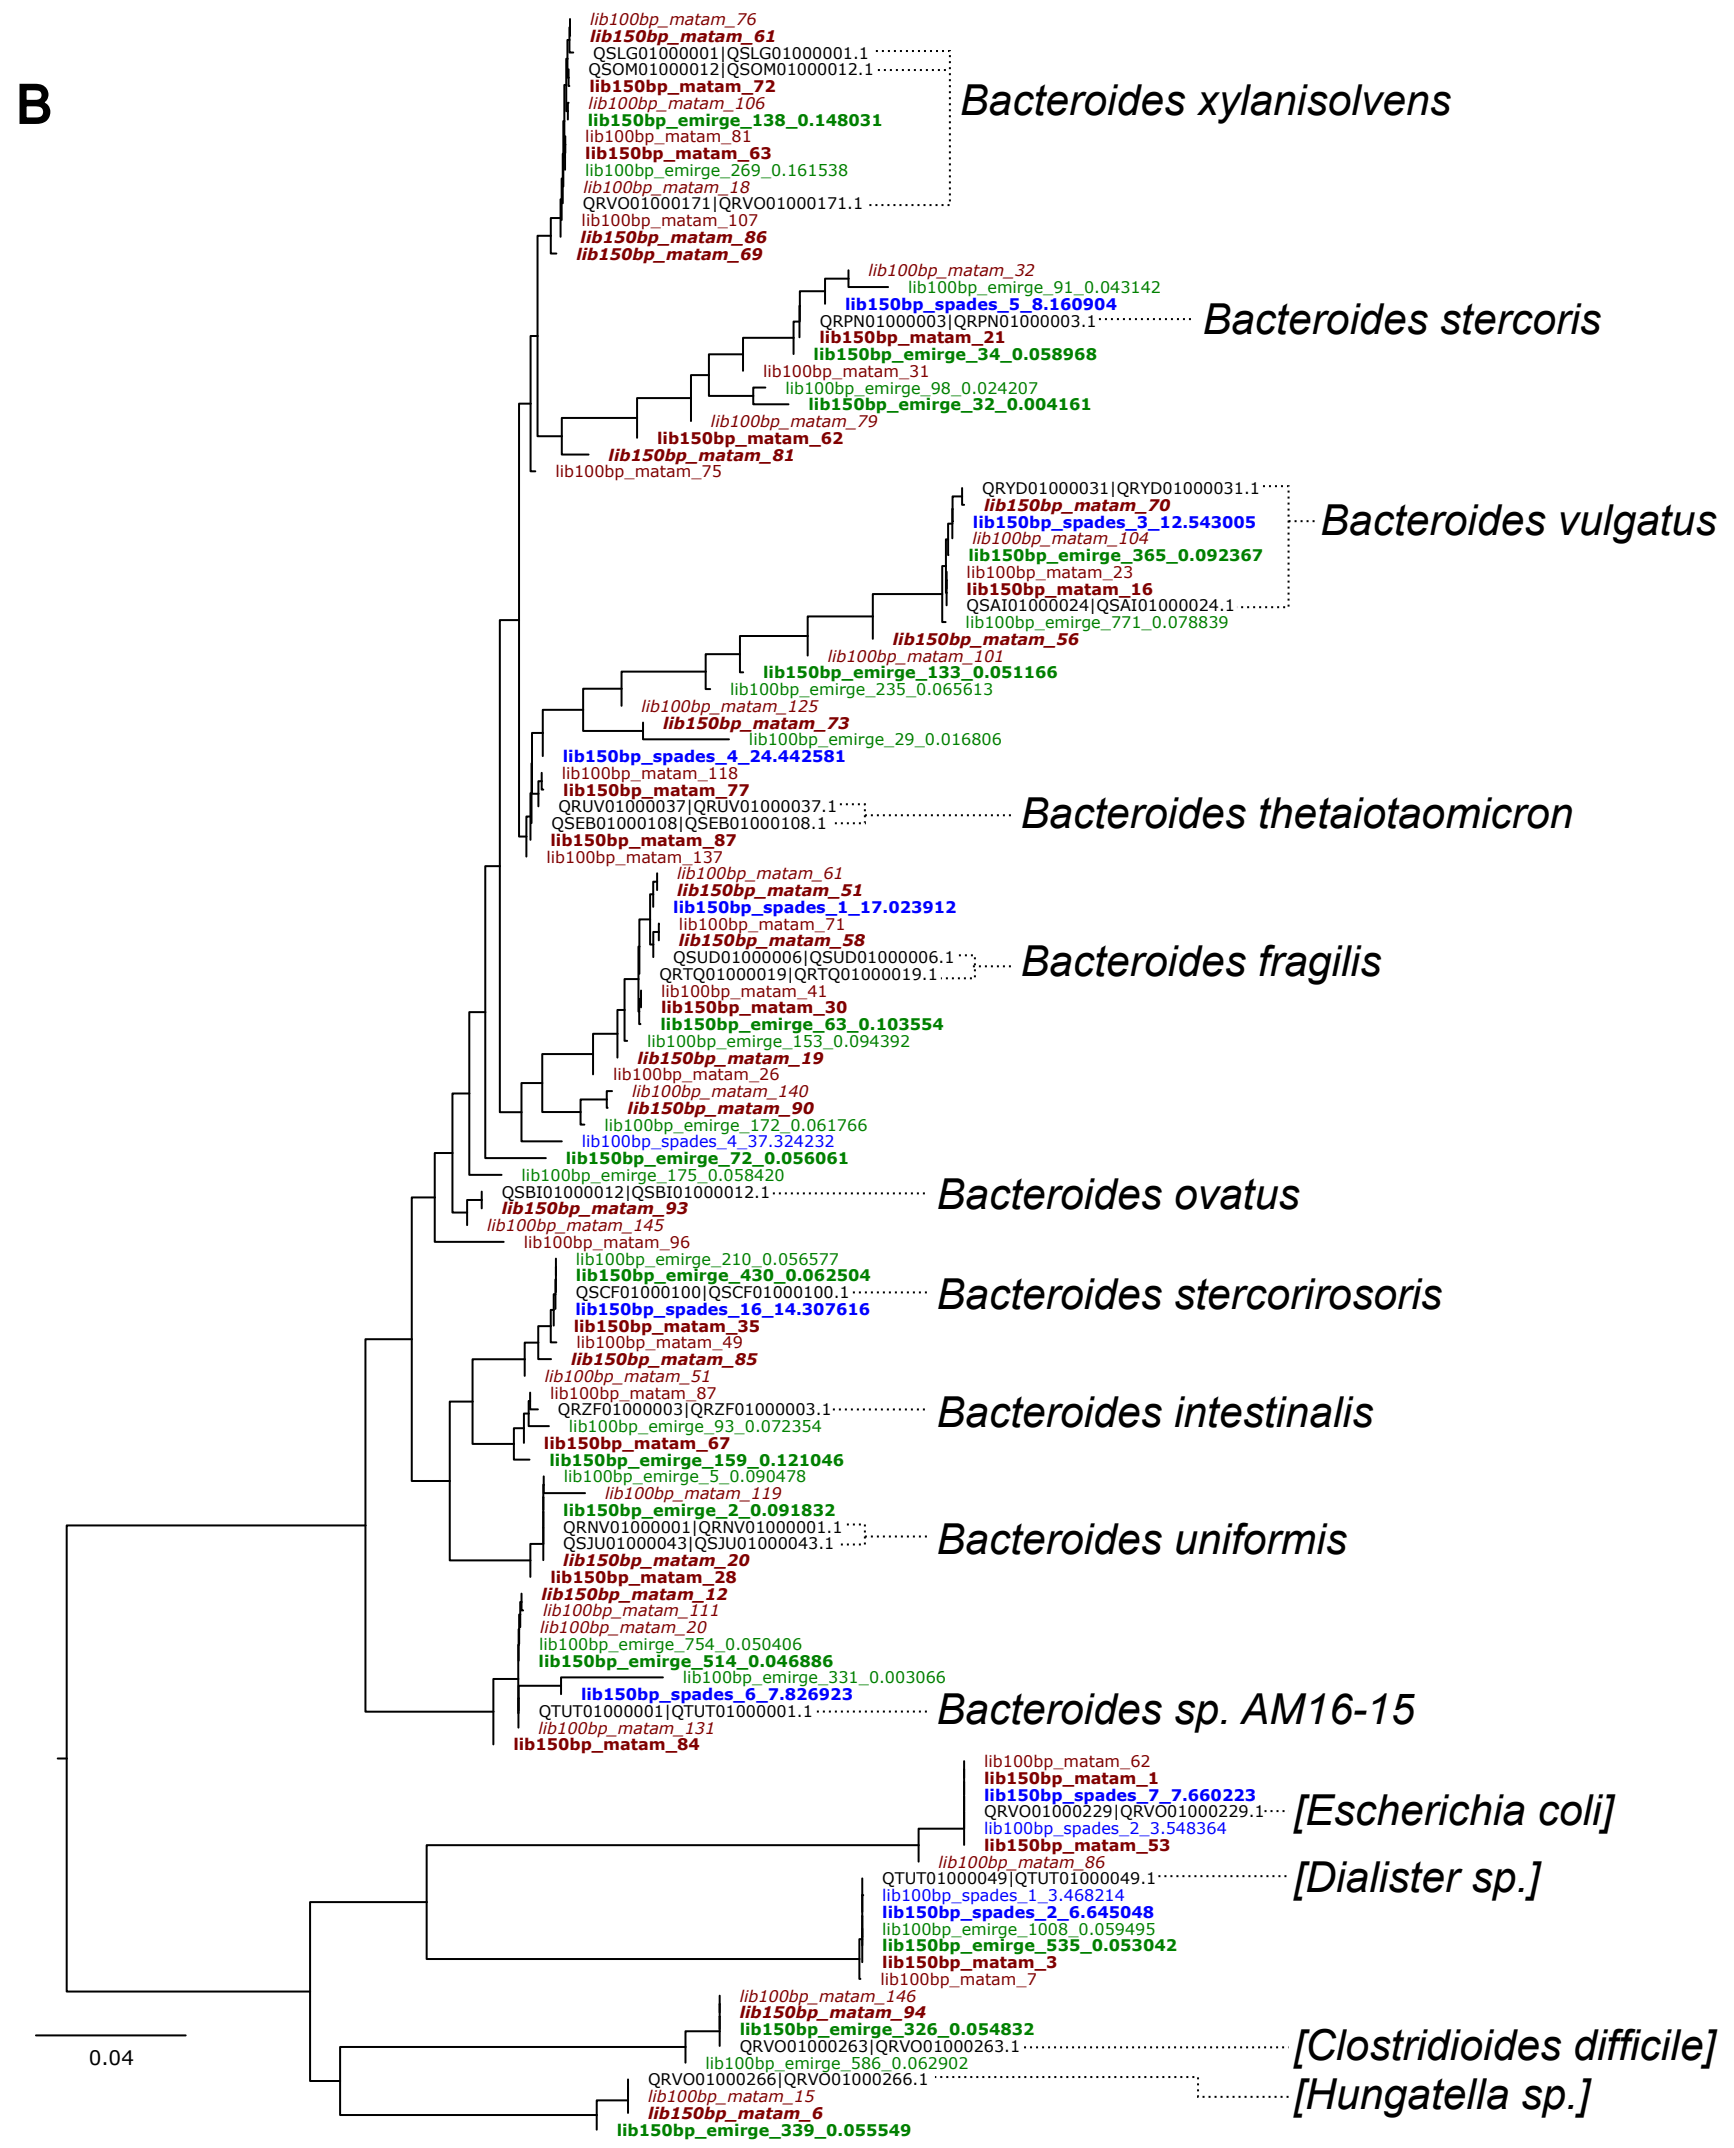

Supplement: mSystems.00920-20-sf005.pdf [file mSystems.00920-20-sf005.pdf]
